# Supplementary material
Source: publisher figshare collection journal article supplement (https://asha.figshare.com/articles/dataset/_/15079173)
Supplement: Supplementary file 2 [file 1]

**Table S2**

*Search Terms and Results*

| Date    | Database                | Search | Term                                                  | Field              | Hits    |
|---------|-------------------------|--------|-------------------------------------------------------|--------------------|---------|
| 9/12/19 | Academic Search Premier | 1      | preschool                                             | <i>Not limited</i> | 42,127  |
| 9/12/19 | Academic Search Premier | 2      | elementary                                            | <i>Not limited</i> | 291,380 |
| 9/12/19 | Academic Search Premier | 3      | (early childhood)                                     | <i>Not limited</i> | 64,962  |
| 9/12/19 | Academic Search Premier | 4      | S1 OR S2 OR S3                                        |                    | 384,840 |
| 9/12/19 | Academic Search Premier | 5      | narrative                                             | <i>Not limited</i> | 171,375 |
| 9/12/19 | Academic Search Premier | 6      | storytelling                                          | <i>Not limited</i> | 12,561  |
| 9/12/19 | Academic Search Premier | 7      | retelling                                             | <i>Not limited</i> | 1,965   |
| 9/12/19 | Academic Search Premier | 8      | S5 OR S6 OR S7                                        |                    | 181,855 |
| 9/12/19 | Academic Search Premier | 9      | S4 AND S8 AND intervention                            | <i>Not limited</i> | 370     |
| 9/12/19 | Academic Search Premier | 10     | Limiters – Scholarly journal and published in English |                    | 342     |
|         |                         |        |                                                       |                    |         |
| 9/12/19 | PsycINFO                | 1      | preschool                                             | <i>Not limited</i> | 98,776  |
| 9/12/19 | PsycINFO                | 2      | elementary                                            | <i>Not limited</i> | 87,939  |
| 9/12/19 | PsycINFO                | 3      | (early childhood)                                     | <i>Not limited</i> | 70,081  |
| 9/12/19 | PsycINFO                | 4      | S1 OR S2 OR S3                                        |                    | 233,653 |
| 9/12/19 | PsycINFO                | 5      | narrative                                             | <i>Not limited</i> | 64,364  |
| 9/12/19 | PsycINFO                | 6      | storytelling                                          | <i>Not limited</i> | 7,033   |
| 9/12/19 | PsycINFO                | 7      | retelling                                             | <i>Not limited</i> | 1,177   |
| 9/12/19 | PsycINFO                | 8      | S5 OR S6 OR S7                                        |                    | 68,864  |
| 9/12/19 | PsycINFO                | 9      | S4 AND S8 AND intervention                            | <i>Not limited</i> | 591     |
| 9/12/19 | PsycINFO                | 10     | Limiters – peer-reviewed and published in English     |                    | 376     |
|         |                         |        |                                                       |                    |         |
| 9/12/19 | ERIC                    | 1      | preschool                                             | <i>Not limited</i> | 48,550  |

| Date    | Database | Search | Term                                             | Field              | Hits    |
|---------|----------|--------|--------------------------------------------------|--------------------|---------|
| 9/12/19 | ERIC     | 2      | elementary                                       | <i>Not limited</i> | 392,276 |
| 9/12/19 | ERIC     | 3      | (early childhood)                                | <i>Not limited</i> | 58,347  |
| 9/12/19 | ERIC     | 4      | S1 OR S2 OR S3                                   |                    | 455,140 |
| 9/12/19 | ERIC     | 5      | narrative                                        | <i>Not limited</i> | 29,044  |
| 9/12/19 | ERIC     | 6      | storytelling                                     | <i>Not limited</i> | 2,964   |
| 9/12/19 | ERIC     | 7      | retelling                                        | <i>Not limited</i> | 719     |
| 9/12/19 | ERIC     | 8      | S5 OR S6 OR S7                                   |                    | 31,751  |
| 9/12/19 | ERIC     | 9      | intervention                                     | <i>Not limited</i> | 83,008  |
| 9/12/19 | ERIC     | 10     | S4 AND S8 AND S9                                 |                    | 538     |
| 9/12/19 | ERIC     | 11     | Limiters – peer-reviewd and published in English |                    | 320     |

*Limiters in searches below: Scholarly (Peer Reviewed) Journals; Published Date: 20190901-20201231; Language: English*

|            |                         |   |                            |                    |       |
|------------|-------------------------|---|----------------------------|--------------------|-------|
| 05/30/2020 | Academic Search Premier | 1 | preschool                  | <i>Not limited</i> | 952   |
| 05/30/2020 | Academic Search Premier | 2 | elementary                 | <i>Not limited</i> | 654   |
| 05/30/2020 | Academic Search Premier | 3 | (early childhood)          | <i>Not limited</i> | 1,933 |
| 05/30/2020 | Academic Search Premier | 4 | S1 OR S2 OR S3             |                    | 3,066 |
| 05/30/2020 | Academic Search Premier | 5 | narrative                  | <i>Not limited</i> | 1,546 |
| 05/30/2020 | Academic Search Premier | 6 | storytelling               | <i>Not limited</i> | 138   |
| 05/30/2020 | Academic Search Premier | 7 | retelling                  | <i>Not limited</i> | 12    |
| 05/30/2020 | Academic Search Premier | 8 | S5 OR S6 OR S7             |                    | 1,631 |
| 05/30/2020 | Academic Search Premier | 9 | S4 AND S8 AND intervention | <i>Not limited</i> | 26    |

*Limiters in searches below: Published Date: 20190901-20201231; Publication Type: Peer Reviewed Journal*

|            |          |   |                   |                    |       |
|------------|----------|---|-------------------|--------------------|-------|
| 05/30/2020 | PyscINFO | 1 | preschool         | <i>Not limited</i> | 952   |
| 05/30/2020 | PyscINFO | 2 | elementary        | <i>Not limited</i> | 654   |
| 05/30/2020 | PyscINFO | 3 | (early childhood) | <i>Not limited</i> | 1,933 |
| 05/30/2020 | PyscINFO | 4 | S1 OR S2 OR S3    |                    | 3,066 |
| 05/30/2020 | PyscINFO | 5 | narrative         | <i>Not limited</i> | 1,546 |

| Date                                                               | Database | Search | Term                       | Field              | Hits  |
|--------------------------------------------------------------------|----------|--------|----------------------------|--------------------|-------|
| 05/30/2020                                                         | PyscINFO | 6      | storytelling               | <i>Not limited</i> | 138   |
| 05/30/2020                                                         | PyscINFO | 7      | retelling                  | <i>Not limited</i> | 12    |
| 05/30/2020                                                         | PyscINFO | 8      | S5 OR S6 OR S7             |                    | 1,631 |
| 05/30/2020                                                         | PyscINFO | 9      | S4 AND S8 AND intervention | <i>Not limited</i> | 26    |
| <i>Limiters in searches below: peer-reviewed, after 09/01/2019</i> |          |        |                            |                    |       |
| 05/30/2020                                                         | ERIC     | 1      | preschool                  | <i>Not limited</i> | 422   |
| 05/30/2020                                                         | ERIC     | 2      | elementary                 | <i>Not limited</i> | 1,737 |
| 05/30/2020                                                         | ERIC     | 3      | (early childhood)          | <i>Not limited</i> | 694   |
| 05/30/2020                                                         | ERIC     | 4      | S1 OR S2 OR S3             |                    | 2,211 |
| 05/30/2020                                                         | ERIC     | 5      | narrative                  | <i>Not limited</i> | 334   |
| 05/30/2020                                                         | ERIC     | 6      | storytelling               | <i>Not limited</i> | 43    |
| 05/30/2020                                                         | ERIC     | 7      | retelling                  | <i>Not limited</i> | 1     |
| 05/30/2020                                                         | ERIC     | 8      | S5 OR S6 OR S7             |                    | 367   |
| 05/30/2020                                                         | ERIC     | 9      | S4 AND S8 AND intervention | <i>Not limited</i> | 10    |
