# Supplementary material
Source: publisher figshare collection journal article supplement (https://asha.figshare.com/articles/dataset/_/15079173)
Supplement: Supplementary file 3 [file 1]

**Table S4**

*Types of Narrative Language Solicited in Interventions and in Outcome Measures*

| Study                                                 | Narrative language solicited in intervention |                           |                            | Narrative language solicited in outcome measures |                           |                            | Incongruity between narrative language solicited in intervention and in outcome measures |
|-------------------------------------------------------|----------------------------------------------|---------------------------|----------------------------|--------------------------------------------------|---------------------------|----------------------------|------------------------------------------------------------------------------------------|
|                                                       | Story Retell                                 | Personal Story Generation | Fictional Story Generation | Story Retell                                     | Personal Story Generation | Fictional Story Generation |                                                                                          |
| Adlof et al. (2014)                                   | ●                                            |                           |                            | ●                                                |                           |                            |                                                                                          |
| Brown et al. (2014)                                   | ●                                            |                           |                            | ●                                                |                           |                            |                                                                                          |
| Carnine & Kinder (1985) <sup>a</sup>                  |                                              |                           |                            | ●                                                |                           |                            | Story retell not in intervention, but assessed                                           |
| Feagans & Farran (1994)                               |                                              |                           |                            |                                                  |                           |                            | Story retell not (explicitly) in intervention, but assessed                              |
| <i>Components of intervention not well described.</i> |                                              |                           |                            | ●                                                |                           |                            |                                                                                          |
| Fien et al. (2011) <sup>a</sup>                       |                                              |                           |                            | ●                                                |                           |                            | Story retell not in intervention, but assessed                                           |
| Freedman & Brooks (1980)                              | ●                                            |                           |                            | ●                                                |                           |                            |                                                                                          |
| Garner & Bochna (2004) <sup>a</sup>                   |                                              |                           |                            | ●                                                |                           |                            |                                                                                          |
| Gillam et al. (2012)                                  |                                              |                           | ●                          | ●                                                |                           | ●                          | Story retell not in intervention, but assessed                                           |
| Gillam et al. (2015)                                  | ●                                            |                           | ●                          | ●                                                |                           | ●                          |                                                                                          |
| Gillam et al. (2014)                                  | ●                                            |                           | ●                          | ●                                                |                           | ●                          |                                                                                          |

| Study                                   | Narrative language solicited in intervention |                           |                            | Narrative language solicited in outcome measures |                           |                            | Incongruity between narrative language solicited in intervention and in outcome measures                                    |
|-----------------------------------------|----------------------------------------------|---------------------------|----------------------------|--------------------------------------------------|---------------------------|----------------------------|-----------------------------------------------------------------------------------------------------------------------------|
|                                         | Story Retell                                 | Personal Story Generation | Fictional Story Generation | Story Retell                                     | Personal Story Generation | Fictional Story Generation |                                                                                                                             |
| Gillam et al. (2018)                    | ●                                            |                           | ●                          | ●                                                |                           | ●                          |                                                                                                                             |
| Green & Klecan-Aker (2012) <sup>a</sup> |                                              |                           |                            |                                                  |                           | ●                          | Fictional story generation not in intervention, but assessed                                                                |
| Henry & Solari (2020) <sup>a</sup>      |                                              |                           |                            | ●                                                |                           |                            | Story retell not in intervention, but assessed                                                                              |
| Hessling & Schuele (2020)               | ●                                            | ●                         |                            |                                                  | ●                         |                            | Story retell in intervention, but not assessed                                                                              |
| Justice et al. (2008)                   | ●                                            |                           | ●                          | ●                                                |                           | ●                          |                                                                                                                             |
| Khan et al. (2014) <sup>a</sup>         |                                              |                           |                            | ●                                                |                           | ●                          | Story retell not in intervention, but assessed<br>Fictional story generation not in intervention, but assessed              |
| Klecan-Aker et al. (1997)               |                                              |                           | ●                          |                                                  | ●                         |                            | Personal story generation not in intervention, but assessed<br>Fictional story generation in intervention, but not assessed |
| Lugo-Neris et al. (2015)                | ●                                            | ●                         |                            | ●                                                |                           | ●                          | Personal story generation in intervention, but not assessed<br>Fictional story generation not in intervention, but assessed |
| McCabe, et al. (2010)                   |                                              | ●                         |                            |                                                  | ●                         |                            |                                                                                                                             |

| Study                                     | Narrative language solicited in intervention |                           |                            | Narrative language solicited in outcome measures |                           |                            | Incongruity between narrative language solicited in intervention and in outcome measures |
|-------------------------------------------|----------------------------------------------|---------------------------|----------------------------|--------------------------------------------------|---------------------------|----------------------------|------------------------------------------------------------------------------------------|
|                                           | Story Retell                                 | Personal Story Generation | Fictional Story Generation | Story Retell                                     | Personal Story Generation | Fictional Story Generation |                                                                                          |
| McGregor (2000)                           |                                              |                           | ●                          | ●                                                |                           | ●                          | Story retell not in intervention, but assessed                                           |
| Miller et al. (2018)                      | ●                                            |                           |                            | ●                                                |                           |                            |                                                                                          |
| Miller et al. (2017)                      |                                              | ●                         | ●                          |                                                  | ●                         | ●                          |                                                                                          |
| Pakulski & Kaderavek (2012)               | ●                                            |                           |                            | ●                                                |                           |                            |                                                                                          |
| Paris & Paris (2007)                      | ●                                            |                           |                            | ●                                                |                           |                            |                                                                                          |
| Petersen et al. (2014)                    | ●                                            | ●                         |                            | ●                                                | ●                         |                            |                                                                                          |
| Petersen et al. (2010)                    | ●                                            |                           | ●                          | ●                                                |                           | ●                          |                                                                                          |
| Petersen et al. (2016)                    | ●                                            |                           |                            | ●                                                |                           |                            |                                                                                          |
| Schoenbrodt et al. (2003)                 | ●                                            |                           |                            | ●                                                |                           | ●                          | Fictional story generation not in intervention, but assessed                             |
| Spencer & Slocum (2010)                   | ●                                            | ●                         |                            | ●                                                | ●                         |                            |                                                                                          |
| Spencer et al. (2013)                     | ●                                            | ●                         |                            | ●                                                | ●                         |                            |                                                                                          |
| Spencer, Petersen, Slocum, & Allen (2015) | ●                                            | ●                         |                            | ●                                                | ●                         |                            |                                                                                          |

| Study                              | Narrative language solicited in intervention |                           |                            | Narrative language solicited in outcome measures |                           |                            | Incongruity between narrative language solicited in intervention and in outcome measures |
|------------------------------------|----------------------------------------------|---------------------------|----------------------------|--------------------------------------------------|---------------------------|----------------------------|------------------------------------------------------------------------------------------|
|                                    | Story Retell                                 | Personal Story Generation | Fictional Story Generation | Story Retell                                     | Personal Story Generation | Fictional Story Generation |                                                                                          |
| Spencer et al. (2019)              | ●                                            |                           |                            | ●                                                |                           |                            |                                                                                          |
| Spencer, Petersen, & Adams (2015)  | ●                                            |                           |                            | ●                                                | ●                         |                            | Personal story generation not in intervention, but assessed                              |
| Spencer et al. (2018)              | ●                                            | ●                         |                            | ●                                                |                           |                            | Personal story generation in intervention, but not assessed                              |
| Spencer et al. (2020)              | ●                                            |                           |                            | ●                                                |                           |                            |                                                                                          |
| Stevens et al. (2010) <sup>a</sup> |                                              |                           |                            | ●                                                |                           |                            | Story retell not in intervention, but assessed                                           |
| Swanson et al. (2005)              | ●                                            |                           | ●                          | ●                                                |                           | ●                          |                                                                                          |
| Tyler & Sandoval (1994)            | ●                                            |                           |                            | ●                                                |                           |                            |                                                                                          |
| Valentino et al. (2015)            | ●                                            |                           |                            | ●                                                |                           |                            |                                                                                          |
| Weddle et al. (2016)               | ●                                            | ●                         |                            | ●                                                | ●                         |                            |                                                                                          |

*Note.* <sup>a</sup> = participants were not explicitly required to produce narrative language as part of the intervention.
