# Supplementary material
Source: publisher figshare collection journal article supplement (https://asha.figshare.com/articles/dataset/_/15079173)
Supplement: Supplementary file 4 [file 1]

**Table S1**

*PICOS Inclusion Criteria*

| Category     | Inclusion                                                                                                                                              | Exclusion                                                                       |
|--------------|--------------------------------------------------------------------------------------------------------------------------------------------------------|---------------------------------------------------------------------------------|
| Participants | Preschool and school-age children<br>With or without disabilities                                                                                      | Adults                                                                          |
| Intervention | Any intervention with the goal of<br>improving oral narrative language                                                                                 | Narrative language interventions<br>focused on written narrative<br>language    |
| Comparison   | Randomized control trials<br>Quasi-experimental<br>Single-case designs                                                                                 | Non-experimental<br>Case studies                                                |
| Outcome      | Narrative language production<br>(macrostructure and microstructure)<br>and comprehension outcomes based<br>on story retell and/or story<br>generation | Non-narrative language outcomes<br>(e.g., vocabulary, reading<br>comprehension) |
| Setting      | United States<br>School, childcare centers, clinic                                                                                                     | Home                                                                            |
