# Supplementary material
Source: publisher figshare collection journal article supplement (https://asha.figshare.com/articles/dataset/_/15079173)
Supplement: Supplementary file 5 [file 1]

**Table S3**

*Data Extraction Categories*

| Category                     | Data Extracted                                                                                                                                                                                                                                                                                                                                                                                     |
|------------------------------|----------------------------------------------------------------------------------------------------------------------------------------------------------------------------------------------------------------------------------------------------------------------------------------------------------------------------------------------------------------------------------------------------|
| Study characteristics        | <p>Year Published</p> <p>Group design:</p> <ul style="list-style-type: none"> <li>RCT or quasi-experimental</li> <li>Within subject</li> </ul> <p>Single-case Design</p>                                                                                                                                                                                                                           |
| Participant characteristics  | <p>Number</p> <p>Male/Female</p> <p>Age</p> <p>Race/Ethnicity</p> <p>Learner Characteristics</p>                                                                                                                                                                                                                                                                                                   |
| Intervention characteristics | <p>Description</p> <p>Duration</p> <p>Interventionist</p> <p>Setting</p> <p>Service delivery model</p> <p>Comparison condition</p> <p>Type of narrative language in intervention</p> <p>Type of narrative language outcomes measured</p> <ul style="list-style-type: none"> <li>-Macrostructure elements</li> <li>-Microstructure elements</li> <li>-Production</li> <li>-Comprehension</li> </ul> |
| Study findings               | <p>Measures used and results</p> <p>Social Validity – measures and results</p> <p>Fidelity – measures and conclusions</p>                                                                                                                                                                                                                                                                          |
