# Supplementary material
Source: publisher figshare collection journal article supplement (https://asha.figshare.com/articles/dataset/_/15079173)
Supplement: Supplementary file 6 [file 1]

**Table S5**

*Group Design Studies – Production Outcomes*

| Author(s) (Year)                                           | Treatment |             | Control       |             | ES                | Narrative                       |         |         |
|------------------------------------------------------------|-----------|-------------|---------------|-------------|-------------------|---------------------------------|---------|---------|
|                                                            | Measure   | <i>N</i>    | <i>M (SD)</i> | <i>N</i>    |                   | <i>M (SD)</i>                   | Outcome | Context |
| <i>Fien et al. (2011)</i>                                  |           |             |               |             |                   |                                 |         |         |
| Macrostructure                                             | 54        | 5.91 (5.59) | 52            | 6.17 (5.83) | -0.05             | Macrostructure                  | RE      | N       |
| Expository Retell                                          | 51        | 2.73 (1.67) | 50            | 1.84 (1.45) | 0.57              | Macrostructure                  | RE      | E       |
| <i>Garner &amp; Bochna (2004)</i>                          |           |             |               |             |                   |                                 |         |         |
| Listening Comprehension Free Recall                        | 35        | NR          | 31            | NR          | 0.00 <sup>a</sup> | Macrostructure                  | RE      | N       |
| Reading Comprehension Free Recall                          | 35        | NR          | 31            | NR          | 0.00 <sup>a</sup> | Macrostructure                  | RE      | N       |
| <i>Gillam et al. (2012) CLI group</i>                      |           |             |               |             |                   |                                 |         |         |
| Monitoring Indicators of Scholarly Language Macrostructure | 8         | 5.88 (2.41) | 8             | 4.75 (3.49) | 0.38              | Macrostructure                  |         | N       |
| Monitoring Indicators of Scholarly Language Microstructure | 8         | 2.62 (1.30) | 8             | 1.63 (0.74) | 0.94              | Microstructure                  |         | N       |
| <i>Gillam et al. (2012) DLI group</i>                      |           |             |               |             |                   |                                 |         |         |
| Monitoring Indicators of Scholarly Language Macrostructure | 8         | 4.14 (0.90) | 8             | 4.75 (3.49) | -0.24             | Macrostructure                  |         | N       |
| Monitoring Indicators of Scholarly Language Microstructure | 8         | 2.43 (0.97) | 8             | 1.63 (0.74) | 0.93              | Microstructure                  |         | N       |
| <i>Gillam et al. (2014)</i>                                |           |             |               |             |                   |                                 |         |         |
| Monitoring Indicators of Scholarly Language                | 21        | 8.79 (4.00) | 19            | 7.94 (2.77) | 0.24              | Macrostructure & microstructure | GE      | N       |

*Henry & Solari, 2020*

|                     |    |             |    |             |      |                |    |   |
|---------------------|----|-------------|----|-------------|------|----------------|----|---|
| Narrative Retelling | 22 | 6.27 (2.33) | 21 | 4.33 (2.50) | 0.80 | Macrostructure | RE | E |
|---------------------|----|-------------|----|-------------|------|----------------|----|---|

*McCabe et al. (2010) Year 1*

|                   |    |             |    |             |      |                |    |   |
|-------------------|----|-------------|----|-------------|------|----------------|----|---|
| Narrative Quality | 28 | 2.16 (2.12) | 20 | 0.45 (3.02) | 0.62 | Macrostructure | GE | N |
|-------------------|----|-------------|----|-------------|------|----------------|----|---|

*McCabe et al. (2010) Year 2*

|                   |    |             |    |              |      |                |    |   |
|-------------------|----|-------------|----|--------------|------|----------------|----|---|
| Narrative Quality | 28 | 1.54 (2.39) | 20 | -0.84 (1.54) | 1.16 | Macrostructure | GE | N |
|-------------------|----|-------------|----|--------------|------|----------------|----|---|

*Paris & Paris (2007)\**

|                                              |    |             |    |             |      |                |    |   |
|----------------------------------------------|----|-------------|----|-------------|------|----------------|----|---|
| Retell—Main Elements Narrative Comprehension | 83 | 2.77 (2.00) | 40 | 2.65 (1.87) | 0.06 | Macrostructure | GE | N |
|----------------------------------------------|----|-------------|----|-------------|------|----------------|----|---|

|                                               |    |             |    |             |       |                |    |   |
|-----------------------------------------------|----|-------------|----|-------------|-------|----------------|----|---|
| Retell—Main Elements Expository Comprehension | 83 | 1.85 (1.55) | 40 | 1.98 (1.99) | -0.08 | Macrostructure | GE | E |
|-----------------------------------------------|----|-------------|----|-------------|-------|----------------|----|---|

*Petersen et al. (2016) TD participants*

|                      |    |             |    |              |      |                |    |   |
|----------------------|----|-------------|----|--------------|------|----------------|----|---|
| Causal subordination | 33 | 2.12 (2.52) | 23 | -0.09 (1.04) | 1.24 | Microstructure | RE | N |
|----------------------|----|-------------|----|--------------|------|----------------|----|---|

|                             |    |             |    |             |      |                                 |    |   |
|-----------------------------|----|-------------|----|-------------|------|---------------------------------|----|---|
| Narrative Language Measures | 33 | 0.56 (0.56) | 23 | 0.04 (0.24) | 1.21 | Macrostructure & microstructure | RE | N |
|-----------------------------|----|-------------|----|-------------|------|---------------------------------|----|---|

*Petersen et al. (2016) LI participants*

|                      |   |             |   |             |      |                |    |   |
|----------------------|---|-------------|---|-------------|------|----------------|----|---|
| Causal subordination | 9 | 2.33 (2.60) | 8 | 0.00 (1.31) | 1.31 | Microstructure | RE | N |
|----------------------|---|-------------|---|-------------|------|----------------|----|---|

|                             |   |             |   |              |      |                                 |    |   |
|-----------------------------|---|-------------|---|--------------|------|---------------------------------|----|---|
| Narrative Language Measures | 9 | 0.41 (0.32) | 8 | -0.01 (0.37) | 1.21 | Macrostructure & microstructure | RE | N |
|-----------------------------|---|-------------|---|--------------|------|---------------------------------|----|---|

*Spencer, Petersen, & Adams (2015)\**

|                             |    |              |    |             |      |                                 |    |   |
|-----------------------------|----|--------------|----|-------------|------|---------------------------------|----|---|
| Narrative Language Measures | 11 | 13.18 (5.56) | 10 | 6.70 (6.71) | 1.06 | Macrostructure & microstructure | RE | N |
|-----------------------------|----|--------------|----|-------------|------|---------------------------------|----|---|

|                       |    |              |    |             |      |                |    |   |
|-----------------------|----|--------------|----|-------------|------|----------------|----|---|
| Bus Story Information | 11 | 14.80 (7.15) | 10 | 8.50 (4.79) | 1.03 | Macrostructure | RE | N |
|-----------------------|----|--------------|----|-------------|------|----------------|----|---|

|                           |    |             |    |             |      |                |    |   |
|---------------------------|----|-------------|----|-------------|------|----------------|----|---|
| Bus Story Sentence Length | 11 | 6.45 (2.46) | 10 | 5.00 (2.10) | 0.63 | Microstructure | RE | N |
|---------------------------|----|-------------|----|-------------|------|----------------|----|---|

|                             |    |              |    |              |      |                                 |    |   |
|-----------------------------|----|--------------|----|--------------|------|---------------------------------|----|---|
| Test of Personal Generation | 11 | 15.27 (5.27) | 10 | 11.30 (8.14) | 0.59 | Macrostructure & microstructure | GE | N |
|-----------------------------|----|--------------|----|--------------|------|---------------------------------|----|---|

*Spencer, Petersen, Slocum, & Allen (2015)\**

|                             |    |                 |    |                |      |                                 |    |   |
|-----------------------------|----|-----------------|----|----------------|------|---------------------------------|----|---|
| Narrative Language Measures | 36 | 11.00 (SE 0.94) | 35 | 8.29 (SE 0.95) | 0.49 | Macrostructure & microstructure | RE | N |
|-----------------------------|----|-----------------|----|----------------|------|---------------------------------|----|---|

|                                      |    |                |    |                |      |                                 |    |   |
|--------------------------------------|----|----------------|----|----------------|------|---------------------------------|----|---|
| Test of Personal Generation          | 36 | 6.62 (SE 0.90) | 35 | 5.82 (SE 0.91) | 0.15 | Macrostructure & microstructure | GE | N |
| <i>Spencer et al. (2020)</i>         |    |                |    |                |      |                                 |    |   |
| Narrative Language Measures          | 43 | 6.86 (5.41)    | 38 | 2.92 (3.77)    | 0.84 | Macrostructure & microstructure | RE | N |
| <i>Spencer et al. (2018)</i>         |    |                |    |                |      |                                 |    |   |
| Narrative Language Measures – Winter | 53 | 10.73 (4.60)   | 52 | 8.26 (5.36)    | 0.49 | Macrostructure & microstructure | RE | N |
| Narrative Language Measures – Spring | 53 | 12.80 (4.29)   | 52 | 10.29 (5.25)   | 0.52 | Macrostructure & microstructure | RE | N |
| <i>Stevens et al. (2010)*</i>        |    |                |    |                |      |                                 |    |   |
| Free Recall Composite                | 86 | 7.03 (3.00)    | 61 | 5.43 (3.30)    | 0.51 | Macrostructure                  | RE | N |

*Note.* <sup>a</sup> = Authors reported no significant difference, but group means and standard deviations were not reported. Thus, effect sizes were estimated as 0.00. \* = posttest means and standard deviations reported; NR = not reported; RE = retell; GE = generation; N = narrative; E = expository.
