# Supplementary material
Source: publisher figshare collection journal article supplement (https://asha.figshare.com/articles/dataset/_/15079173)
Supplement: Supplementary file 7 [file 1]

**Table S6**

*Group Design Studies – Comprehension Outcomes*

| Author(s) (Year)                      | Treatment |               | Control  |               | ES    | Narrative |       |
|---------------------------------------|-----------|---------------|----------|---------------|-------|-----------|-------|
| Measure                               | <i>N</i>  | <i>M (SD)</i> | <i>N</i> | <i>M (SD)</i> |       | Outcome   | Genre |
| <i>Garner &amp; Bochna (2004)</i>     |           |               |          |               |       |           |       |
| Prompted Recall Character             | 35        | 1.94 (1.45)   | 31       | 1.30 (1.20)   | 0.30  | LC        | N     |
| Prompted Recall Setting               | 35        | 2.11 (1.23)   | 31       | 0.77 (0.90)   | 1.23  | LC        | N     |
| Prompted Recall Problem               | 35        | 1.60 (0.69)   | 31       | 1.63 (0.93)   | -0.04 | LC        | N     |
| Prompted Recall Solution              | 35        | 2.14 (1.33)   | 31       | 1.43 (1.10)   | 0.58  | LC        | N     |
| Prompted Recall Character             | 35        | 1.77 (0.77)   | 31       | 1.09 (1.11)   | 0.72  | RC        | N     |
| Prompted Recall Setting               | 35        | 1.77 (0.94)   | 31       | 0.97 (1.02)   | 0.82  | RC        | N     |
| Prompted Recall Problem               | 35        | 2.00 (0.94)   | 31       | 1.45 (0.99)   | 0.57  | RC        | N     |
| Prompted Recall Solution              | 35        | 2.23 (0.97)   | 31       | 1.68 (1.25)   | 0.50  | RC        | N     |
| <i>Gillam et al. (2012) CLI group</i> |           |               |          |               |       |           |       |
| Test of Narrative Language            | 8         | 9.25 (1.9)    | 8        | 7.38 (2.06)   | 0.94  | LC        | N     |
| <i>Gillam et al. (2012) DLI group</i> |           |               |          |               |       |           |       |
| Test of Narrative Language            | 8         | 8.00 (2.16)   | 8        | 7.38 (2.06)   | 0.29  | LC        | N     |

*Henry & Solari, 2020*

|                                      |    |          |    |             |      |    |   |
|--------------------------------------|----|----------|----|-------------|------|----|---|
| CELF Understanding Spoken Paragraphs | 22 | 8 (3.19) | 21 | 5.81 (3.27) | 0.68 | LC | N |
|--------------------------------------|----|----------|----|-------------|------|----|---|

*Paris & Paris (2007)\**

|                        |    |             |    |             |       |    |   |
|------------------------|----|-------------|----|-------------|-------|----|---|
| Explicit Comprehension | 83 | 6.71 (1.97) | 40 | 6.05 (1.48) | 0.36  | LC | N |
| Implicit Comprehension | 83 | 6.33 (2.15) | 40 | 5.78 (1.33) | 0.29  | LC | N |
| Explicit Comprehension | 83 | 3.26 (1.22) | 40 | 3.65 (1.17) | -0.32 | LC | E |
| Implicit Comprehension | 83 | 3.02 (0.95) | 40 | 3.60 (0.84) | -0.63 | LC | E |

*Spencer et al. (2020)*

|                                   |    |             |    |             |      |    |   |
|-----------------------------------|----|-------------|----|-------------|------|----|---|
| Assessment of Story Comprehension | 43 | 4.23 (3.39) | 38 | 2.71 (2.95) | 0.48 | LC | N |
|-----------------------------------|----|-------------|----|-------------|------|----|---|

*Spencer et al. (2015)\**

|                             |    |                |    |                |      |    |   |
|-----------------------------|----|----------------|----|----------------|------|----|---|
| Test of Story Comprehension | 36 | 6.92 (SE 0.45) | 35 | 5.42 (SE 0.46) | 0.56 | LC | N |
|-----------------------------|----|----------------|----|----------------|------|----|---|

*Spencer et al. (2018)*

|                                            |    |             |    |             |      |    |   |
|--------------------------------------------|----|-------------|----|-------------|------|----|---|
| Assessment of Story Comprehension – Winter | 53 | 7.81 (4.70) | 52 | 6.16 (5.10) | 0.34 | LC | N |
| Assessment of Story Comprehension – Spring | 53 | 8.4 (4.56)  | 52 | 7.21 (4.66) | 0.26 | LC | N |

*Stevens et al. (2010)\**

|                           |    |            |    |             |      |    |   |
|---------------------------|----|------------|----|-------------|------|----|---|
| Prompted Recall Composite | 86 | 8.06 (2.5) | 61 | 5.48 (2.70) | 1.00 | LC | N |
|---------------------------|----|------------|----|-------------|------|----|---|

*Note.* \* = posttest means and standard deviations reported; LC = comprehension-listening; RC = comprehension-reading; N = narrative; E = expository.
